1 **Repertoire of naturally acquired maternal antibodies transferred to infants for**  
2 **protection against shigellosis**

3  
4 **Esther Ndungo<sup>1</sup>, Liana R. Andronescu<sup>1</sup>, Andrea G Buchwald<sup>1, #</sup>, Patricia Mawindo<sup>2</sup>, Miriam**  
5 **K. Laufer<sup>1</sup>, Marcela F. Pasetti<sup>1\*</sup>**

6  
7 <sup>1</sup>Center for Vaccine Development and Global Health, University of Maryland School of Medicine,  
8 685 W, Baltimore Street, Baltimore, MD, 21201, USA

9 <sup>2</sup> Blantyre Malaria Project, University of Malawi College of Medicine, Blantyre, Malawi.

10 #Present address: Department of Environmental and Occupational Health, University of  
11 Colorado, Anschutz, Aurora, USA.

12  
13 **\*Correspondence:**

14 Marcela F. Pasetti

15 e-mail: [mpasetti@som.umaryland.edu](mailto:mpasetti@som.umaryland.edu)

16  
17  
18 **Keywords:** maternal antibodies, transplacental antibody transfer, *Shigella* antibodies, naturally  
19 acquired immunity, infant immunity

20 Abstract word count: 299

21 Text word count: 4899

22 Figures: 6

23 Tables: 3

24 **Abstract**

25 *Shigella* is the second leading cause of diarrheal diseases, accounting for >200,000 infections  
26 and >50,000 deaths in children under 5 years of age worldwide. The incidence of *Shigella*-induced  
27 diarrhea is relatively low during the first year of life and increases substantially (reaching its peak)  
28 between 11 to 24 months of age. This epidemiological trend hints to an early protective immunity  
29 of maternal origin and an increase in disease incidence when maternal immunity wanes. The  
30 magnitude, type, antigenic diversity and anti-microbial activity of maternal antibodies transferred  
31 via placenta that can prevent shigellosis during early infancy are not known. To address this  
32 knowledge gap, *Shigella*-specific antibodies directed against the lipopolysaccharide (LPS) and  
33 virulent factors (IpaB, IpaC, IpaD, IpaH and VirG) and antibody mediated serum bactericidal  
34 (SBA) and opsonophagocytic killing antibody (OPKA) activity were measured in maternal and  
35 cord blood sera from a longitudinal cohort of mother-infant pairs living in rural Malawi. Protein-  
36 specific IgG (very high levels) and *Shigella* LPS were detected in maternal and cord blood sera;  
37 efficiency of placental transfer was 100% and 60%, respectively and was associated with IgG  
38 subclass distribution (protein-specific IgG1 > LPS-specific IgG2). In contrast, SBA and OPKA  
39 activity in cord blood was substantially lower as compared to maternal serum and varied among  
40 *Shigella* serotypes. LPS was identified as a target of SBA and OPKA activity. Maternal sera had  
41 remarkably elevated *Shigella flexneri* 2a LPS IgM indicative of recent exposure. Our study  
42 revealed a broad repertoire of maternally acquired antibodies in infants living in a *Shigella*-  
43 endemic region and highlights the abundance of protein-specific antibodies and their likely  
44 contribution to disease prevention during the first months of life. These results contribute new  
45 knowledge on maternal infant immunity and target antigens that can inform the development of  
46 vaccines or therapeutics that can extend protection after maternal immunity wanes.

## 47 **Introduction**

48 *Shigella* spp. are major contributors of the global diarrheal disease burden, accounting for more  
49 than 250 million cases and 200,000 deaths annually (1, 2). The most affected are children under  
50 5 years of age living in low- and middle-income countries (LMIC) (2, 3). Though usually self-  
51 limiting, repeated bouts of disease result in debilitating sequelae including malnutrition, growth  
52 stunting, and deficits in immune and cognitive development (3, 4). The preeminence of multidrug  
53 resistant *Shigella* strains globally makes the development of vaccines and therapeutics a  
54 compelling priority (5). Because the burden of disease disproportionately affects young children,  
55 a clear understanding of the elements and immune mechanisms that can protect this group is  
56 necessary to inform the development of efficacious vaccines or prophylaxes.

57 Most of what is known to date about *Shigella* immunity has been learned from infections in adults.  
58 Individuals living in endemic regions acquire natural immunity from repeated exposure (6-9).  
59 While there is no definitive immune correlate of protection against shigellosis, serum IgG against  
60 the *Shigella* surface-exposed lipopolysaccharide (LPS) has been associated with reduced risk of  
61 infection with serotype matching strains in early field trials [reviewed in Ref (10)]. We have  
62 reported a strong correlation between serum IgG specific for the *Shigella* invasion plasmid antigen  
63 (Ipa) B and the virulence protein, VirG (IcsA), and reduced risk of infection in a controlled human  
64 infection model (CHIM) study (11). In the same experimentally infected adult volunteers,  
65 complement-mediated serum bactericidal (SBA) and opsonophagocytic killing (OPKA) were  
66 identified as functional attributes of *Shigella*-specific antibodies associated with clinical protection  
67 (11).

68 Children living in endemic regions produce serum LPS- and Ipa-specific IgG in response to  
69 *Shigella* infection, and the magnitude of these responses increases progressively through  
70 adulthood (6, 9, 12, 13). Multiple surveillance studies have reported consistently that the rate of  
71 *Shigella* infection is relatively low during the first months of life, but gradually increases and

72 reaches its peak during the second year of life (14, 15). The shielding of young infants from  
73 *Shigella*-induced diarrhea (while they still suffer from other enteric infections such as rotavirus),  
74 hints to a putative pathogen-specific protection afforded by maternal immunity (antibodies  
75 transferred via placenta and the immune components of breast milk (16)). Studies of  
76 transplacental antibody transfer against other pathogens have shown that this process—termed  
77 placental “sieving” (17)—is regulated and selective, antigen-dependent (18, 19), and favors  
78 transfer of antibodies with specific biophysical features that render them most functional in the  
79 context of the immature neonatal immune system (17). Information on antigen-specificity,  
80 magnitude, subclass distribution and function of *Shigella* antibodies in mothers and infants and  
81 the process of placental transfer is lacking. Here, we characterized the specificity and anti-  
82 microbial function of *Shigella*-specific antibodies in mothers and their infants at birth in a  
83 longitudinal cohort from rural Malawi. The magnitude of serum IgG (and IgG subclasses) specific  
84 for *S. flexneri* 2a LPS, *S. sonnei* LPS, IpaB, IpaC, IpaD, IpaH, and VirG were determined. SBA  
85 and OPKA levels and the target antigen mediating complement- and phagocytic-effector functions  
86 were investigated. Finally, correlative analysis and comparison with protective thresholds were  
87 conducted to identify unique features and the potential anti-microbial activity in vivo of *Shigella*  
88 antibodies in mother-infant pairs.

89

## 90 **Results**

91

### 92 **Cohort characteristics**

93 This study utilized a mother-infant cohort from a malaria surveillance study in Malawi. Participants  
94 were enrolled from the rural villages in Chikwawa and in the southern region of Malawi. Out of  
95 108 mother and infant pairs enrolled, 63 mother-infant pairs were analyzable (Figure 1). Cord  
96 blood was collected at birth. Maternal blood was obtained at recruitment within 3 months of

97 delivery. Characteristics of the cohort are summarized in Table 1. Mean age of the mothers was  
98 26.8 years (17-43 years). Median maternal parity was 3 (0-8). Among the infants, 36 (57%) were  
99 female and 5 (8%) had a low birth weight (less than 2.5kg). As for the season of birth, 21 (33%)  
100 were born during the rainy season (November – April).

101

## 102 ***Shigella* antigen-specific IgG in mothers and their newborns**

103 Naturally acquired *Shigella*-specific antibodies were determined in paired maternal and cord blood  
104 sera. The antigenic repertoire analysis was focused on *S. flexneri 2a* and *S. sonnei*, as these  
105 strains had been attributed the highest incidence of moderate-to-severe diarrhea (MSD) in <5-  
106 year-old children (37.8% and 13.5%, respectively) in Malawi-neighboring Mozambique by the  
107 Global Enteric Multicenter Study (GEMS) (20); precise information on *Shigella* prevalence in  
108 Malawi is not available. *S. flexneri 2a* and *S. sonnei* LPS-specific IgG titers in maternal sera were  
109 significantly higher as compared to those in cord blood (Figure 2A). The cord to maternal *S.*  
110 *flexneri 2a* and *S. sonnei* LPS IgG transfer ratio were 0.60 and 0.70 respectively (Figure 2B, Table  
111 2), indicating low transplacental sieving efficiency of LPS IgG.

112 Maternal and cord IgG levels against five different *Shigella* virulent factors: IpaB, IpaC, IpaD,  
113 IpaH, and VirG and their placental transfer efficiency were also determined (Figure 2A and 2B).  
114 High levels of circulating IgG specific for all protein antigens were detected in both maternal and  
115 cord blood sera, which far surpassed the levels of IgG against LPS (Figure 2A). Likewise,  
116 placental transfer of protein-specific maternal IgG was more efficient than the transfer of LPS-  
117 specific IgG; mean transfer ratios were: 1.10, 1.53, 0.98, 0.99 and 1.01 for anti-IpaB, -IpaC, -IpaD,  
118 -IpaH, and -VirG antibodies, respectively (Figure 2B and Table 2). Despite differences in transfer  
119 efficiency between LPS- and protein-specific antibody titers, there was a significant and positive  
120 linear correlation between maternal and cord blood IgG levels for all antigens, implicating a  
121 distinct regulated transport (Figure 2C). A comparative analysis of maternal antibody specificity

122 (including all *Shigella* antigens tested) revealed positive associations on the basis of antigenic  
123 target (protein or LPS). Protein-specific antibody levels were generally highly and positively  
124 associated ( $r > 0.5$ ) as were *S. flexneri* 2a and *S. sonnei* LPS IgG titers (Pearson's  $r > 0.6$ ) (Figure  
125 2D). Antibodies against *S. flexneri* 2a and *S. sonnei* LPS are not expected to be cross-reactive  
126 (7, 21, 22). Therefore, the observed association between the two suggests that most mothers had  
127 been exposed and responded similarly to both serotypes. Correlations between protein- and LPS-  
128 specific antibody titers were generally lower (Pearson's  $r < 0.4$ ), except for the association  
129 between IpaC- and both *S. flexneri* 2a and *S. sonnei* LPS IgG (Figure 2D). These associations  
130 were mirrored in the antibody responses in the infant serum, confirming the selective and  
131 regulated principles of placental antibody transfer (Figure 2D). Geometric mean titers (GMT),  
132 mean transfer ratios, and standard deviations (SD) between maternal and cord serum titers are  
133 summarized in Table 2.

134

### 135 ***Shigella* protein- and LPS-specific IgG subclass placental transfer**

136 Placental transport of maternal antibodies is primarily mediated through binding to the neonatal  
137 Fc receptor (FcRn) expressed in syncytiotrophoblast (23, 24). Qualitative differences in the Fc  
138 structure, such as in the human IgG subclasses, can influence FcRn binding and placental  
139 transfer (25). We therefore explored IgG subclass distribution of *Shigella*-specific antibodies as a  
140 contributor to the observed differences in IgG transfer efficiency.

141 As with total IgG titers, protein-specific IgG subclasses had common features, which differed from  
142 those against LPS. In both the mothers and their infants, IgG1 was the most abundant subclass  
143 against all protein antigens, followed by IgG2 and IgG3. In contrast, IgG2 was the most abundant  
144 subclass against both *S. flexneri* 2a and *S. sonnei* LPS. IgG4 titers were generally the lowest for  
145 all antigens tested (Figure 3A). For protein antigens, IgG1 and IgG4 had the highest cord-  
146 blood:maternal mean transfer ratios (1.05-1.27 and 1.29-1.68, respectively, Figure 3B and C).

147 For LPS antigens, IgG1 also exhibited the highest mean transfer ratios: 1.3 and 1.58 for *S. flexneri*  
148 2a and *S. sonnei*, respectively (Figure 3B). Mean transfer ratios for LPS IgG2 were lower,  
149 regardless of the serotype. The predominance of maternal LPS-IgG2 and the lower transfer  
150 efficiency of IgG2 explains the low levels of LPS IgG in the cord blood despite their abundance in  
151 maternal circulation. The mean transfer ratios for antigen-specific IgG compared to IgG  
152 subclasses are represented in a heatmap (Figure 3C).

153

#### 154 **Functional capacity of placentally transferred *Shigella*-specific antibodies**

155 In addition to antibody specificity through direct binding, we examined the functional capacity of  
156 maternal and placentally-acquired antibodies to render complement-dependent bactericidal and  
157 opsonophagocytic activity. SBA and OPKA activity was detected in both maternal and newborn  
158 sera. Maternal SBA and OPKA titers against *S. flexneri* 2a were significantly higher as compared  
159 to those against *S. sonnei* (GMT 26,944 compared to 306, respectively). Maternal SBA and OPKA  
160 titers specific for *S. flexneri* 2a were also significantly higher in maternal sera as compared to  
161 those of cord blood (Figure 4A and 4B); the mean transfer ratios were 0.16 and 0.18, respectively  
162 (Figure 4A and B, and Table 3). In contrast, SBA and OPKA titers against *S. sonnei* in maternal  
163 serum and in infant serum were comparable (Figure 4A); the mean transfer ratios were 1.29 and  
164 0.82 (Figure 4B and Table 3). It was noticed that while maternal and cord blood functional antibody  
165 titers against *S. sonnei* were strongly correlated, those against *S. flexneri* 2a were not (Figure 4C  
166 and D). The discrepancy in functional antibody titer against *S. flexneri* 2a between mothers and  
167 infants prompted us to investigate the specificity and type of antibodies involved in bactericidal  
168 and opsonophagocytic killing.

169

#### 170 **Specificity of maternally acquired functional antibodies**

171 Mouse monoclonal antibodies specific for *Shigella* LPS were reported to have bactericidal activity  
172 (21). Several studies have reported increases in SBA titers in response to *Shigella*  
173 polysaccharide-based vaccine candidates in adult volunteers (26-28). LPS is therefore presumed  
174 to be the main antigenic target of antibody-mediated shigellacidal activity. We probed the antigen-  
175 specificity of the SBA activity in our cohort by evaluating complement-dependent *Shigella* killing  
176 in sera that had been pre-incubated with increasing amounts of IpaB or LPS to sequester specific  
177 antibodies; efficiency of antibody removal was demonstrated by a decrease of ELISA binding  
178 signal (Figure 5A left). Depletion of *S. flexneri* 2a and *S. sonnei* LPS antibodies from both maternal  
179 and cord blood serum resulted in a proportional (dose-responsive) reduction of bactericidal  
180 activity that was serotype-specific (Figure 5A). Depletion of IpaB-specific antibodies had no effect  
181 on *S. flexneri* 2a killing. These results confirm the LPS-specificity of the maternal and infant SBA  
182 antibodies.

183 Having identified LPS as molecular target of antibody function, we compared LPS IgG and SBA  
184 titers in both maternal and infant serum. A positive and significant correlation was observed  
185 between maternal *S. sonnei* LPS IgG and SBA (Pearson's  $r = 0.686$ ) but the same was not true  
186 for *S. flexneri* 2a (Pearson's  $r = 0.281$ ) (Figure 5B). However, in the infants, LPS IgG and SBA  
187 titers were positively and significantly correlated for both *S. flexneri* 2a (Pearson's  $r = 0.614$ ) and  
188 *S. sonnei* (Pearson's  $r = 0.707$ ) (Figure 5F). These results hinted that another component,  
189 different from IgG, was contributing to maternal *S. flexneri* 2a SBA but was not sieved through  
190 the placenta.

191 IgM is a strong activator of complement that could account for the excess maternal *S. flexneri* 2a  
192 SBA and OPKA observed. LPS-specific IgM titers against both *S. flexneri* 2a and *S. sonnei* LPS  
193 were detected in maternal serum and in a handful of cord blood samples by ELISA (Figure 5C).  
194 While similar in the infants, there was substantially higher IgM against *S. flexneri* 2a as compared  
195 to *S. sonnei* LPS (mean of 263 EU/mL compared to 99 EU/mL) in maternal blood (Figure 5C).



196 Depletion of maternal IgM greatly diminished *S. flexneri* 2a SBA (Figure 5D). *S. flexneri* 2a SBA  
197 titers measured in the IgM-depleted maternal sera were strongly associated with maternal LPS-  
198 specific IgG (Pearson's  $r = 0.64$ ); this was in contrast to the limited correlation observed when  
199 SBA was measured in intact (IgM- and IgG-containing) sera (Figure 5E). These results attribute  
200 complement dependent *Shigella* killing activity to both LPS-specific circulating IgG and IgM. In  
201 the correlation analyses, maternal *S. flexneri* 2a SBA was more closely associated with LPS IgM  
202 (likely due to its abundance in sera) while *S. sonnei* SBA was mostly associated with LPS IgG  
203 (Figure 5F). Associations were also calculated for SBA and LPS-specific IgG, IgG1-4 and IgM for  
204 both strains in maternal and cord blood. IgG2 (the predominant LPS-specific antibody) was the  
205 subclass most associated with *S. sonnei* and *S. flexneri* 2a SBA in cord blood serum (Figure 5F).  
206 IgG1 against *S. sonnei* LPS was equally associated with SBA in the infants.

207

## 208 **Comparisons with protective titers**

209 Finally, to place the mother-infant antigen-specific and functional antibody titers determined in this  
210 study in the context of protective immunity, we compared serological outcomes in the dyad with  
211 those measured in individuals who remained healthy or had only mild disease when challenged  
212 with wild type *S. flexneri* 2a in a CHIM study (11). IpaB and *S. flexneri* 2a LPS-IgG titers in  
213 maternal serum and cord blood were significantly higher than those found in adult American  
214 volunteers that remained healthy post experimental oral challenge (Figure 6A). Likewise, maternal  
215 *S. flexneri* SBA and OPKA titers were similar or higher than those of the same protected  
216 individuals. In contrast, the functional SBA and OPKA antibodies in the infants were significantly  
217 lower than those of volunteers clinically protected against experimental *Shigella* infection (Figure  
218 6B).

219

## 220 **Discussion**

221 Through lifelong exposure, adults living in endemic regions develop natural immunity against  
222 *Shigella*, which has been attributed to antibodies against serotype specific LPS (10). The  
223 incidence of moderate to severe diarrhea attributable to *Shigella* progressively increases after the  
224 first year of life, reaching its peak in young children 24 to 59 months of age. Although they  
225 experience other diarrheal diseases, young infants are shielded from *Shigella* dysentery  
226 presumably through maternal immunity acquired via placenta or breast milk (16). The exact  
227 elements that prevent infection in these children, the contribution of antibodies specific for LPS or  
228 for other bacterial antigens, and the antimicrobial mechanisms involved are not known. An  
229 understanding of the particular components of this shielding immunity is important as new  
230 candidate vaccines targeted for the susceptible infant and toddler groups continue to advance in  
231 the clinical pathway. To identify maternally derived humoral immune components that may  
232 contribute to protection of young infants during the first months of life, we characterized the  
233 repertoire of *Shigella*-specific antibodies in a cohort of Malawian mothers and their infants around  
234 the time of birth.

235 Serum IgG specific for both *S. flexneri* 2a LPS and *S. sonnei* LPS were detected in maternal and  
236 in cord blood sera, although their placental transfer efficiency was moderate, between 0.6 and  
237 0.7. Two previous studies of transplacental transfer of antibodies against *S. flexneri* 2a and *S.*  
238 *sonnei* LPS in Israel (29) and against *S. sonnei* LPS in Vietnam (30), also found high levels of  
239 IgG specific for *Shigella* LPS in maternal sera. The mothers in our cohort had clearly been  
240 exposed to both *S. flexneri* 2a and *S. sonnei*, which is consistent with the reported serotype  
241 prevalence in countries neighboring Malawi (20), and other endemic regions (29, 31, 32). The  
242 study in Vietnam reported a much higher median transfer ratio (1.33) for *S. sonnei* LPS IgG (30)  
243 than was observed in our cohort, which may reflect regional differences in seroprevalence due to  
244 *Shigella* circulation (and possibly increased proportion of LPS-specific IgG1).

245 An abundance of serum IgG against *Shigella* type 3 secretion system proteins IpaB, IpaC, IpaD,  
246 IpaH, and the virulence factor, VirG were observed in maternal and infant circulation, with levels  
247 being substantially higher than those of antibodies specific for LPS. Such a detailed serological  
248 interrogation of protein specific antibodies had been hindered by the difficulty in obtaining *Shigella*  
249 antigens of high quality and in sufficient yield; classical literature that report Ipa antibody analyses  
250 in endemic regions typically relied on crude and undefined protein extracts (9, 12). Different from  
251 antibodies to LPS, protein-specific antibodies were efficiently transferred to the newborns; cord  
252 blood IgG titers were similar or even higher than those in maternal sera for all the proteins  
253 examined. Consistent with our findings, a reduced placental transfer of LPS compared to protein  
254 antibodies has been reported for other pathogens, such as *Haemophilus influenzae*, *Neisseria*  
255 *meningitidis*, and *Streptococcus pneumoniae* (33-35). Despite the differences in magnitude, we  
256 observed that maternal and infant antibody levels were correlated for all antigens, which confirms  
257 the regulated and selective nature of transplacental transfer in a process that is antigen/antibody  
258 dependent. *Shigella*-specific placental antibody sieving was distinctly linked to IgG subclass.  
259 While protein-specific antibodies were primarily IgG1 (followed by IgG2, IgG3 and IgG4), *S.*  
260 *flexneri* 2a and *S. sonnei* LPS-specific IgG contained mainly of IgG2 (followed by IgG1, IgG3 and  
261 IgG4). The superior levels of protein-specific IgG1 in infant blood as compared to LPS-specific  
262 IgG2 is consistent with the hierarchy of receptor-mediated IgG subclass transport based on affinity  
263 to FcRn and other placental Fc receptors (34-36). Given their distinct functional attributes, the IgG  
264 subclass profile available to the infants will determine the anti-microbial capacity of humoral  
265 immunity early in life (1, 23, 43).

266 SBA and OPKA titers have been correlated with clinical protection in adults experimentally  
267 infected with virulent *S. flexneri* 2a (11). We confirmed *Shigella* LPS as a target antigen for *S.*  
268 *flexneri* 2a SBA activity in both maternal and infant sera. Consistently, LPS IgG (and particularly  
269 IgG2) was strongly correlated with SBA activity for both *S. flexneri* 2a and *S. sonnei*. Interestingly,

270 IgG2, which makes the bulk of LPS-IgG, is a poor complement activator. Notwithstanding, IgG2  
271 is known to mediate complement-dependent killing of *Haemophilus influenzae* type b, albeit not  
272 as efficiently as IgG1 (37). On the other hand, LPS IgG2 may activate an alternate pathway when  
273 epitope densities are high (38), which is likely the case for a surface-exposed target like LPS.  
274 IgG2 can act in a complement independent manner as has been shown with opsonophagocytic  
275 activity against *S. pneumoniae* (39), which is consistent with OPKA activity observed in our study.  
276 An unexpectedly enhanced SBA and OPKA activity against *S. flexneri* 2a was observed in the  
277 mothers (but not in the infants) from our cohort that was linked to high levels of IgM (a potent  
278 activator of complement that is not placentally transferred). A dissimilar functional activity between  
279 maternal and infant human sera, also due to maternal IgM, had been shown against *E. coli* and  
280 *Salmonella* (40, 41). Though mothers in our cohort had comparable levels of LPS IgG against  
281 both serotypes, maternal LPS-specific IgM against *S. flexneri* 2a was markedly higher resulting  
282 in heightened SBA activity. Differences in IgM levels likely reflect frequency of exposures and  
283 strain circulation, suggesting, in our study, a higher prevalence of *S. flexneri* 2a as compared to  
284 *S. sonnei* in the Blantyre, Malawi region. A handful of infant samples had detectable IgM against  
285 LPS from both serotypes. IgM against environmental and vaccine antigens has been reported in  
286 cord blood from infants in LMIC countries but not in those from industrialized nations. The origin  
287 of this IgM is unclear and presumed to reflect environmental factors, such as intrauterine  
288 infections that affect placenta integrity (42, 43), and non-specific natural antibodies (42, 44).  
289 Maternal SBA and OPKA against both serotypes were strongly associated implying shared  
290 antibody contribution to microbial killing.

291 The underlying premise for dissecting the humoral immune profile against *Shigella* in mothers  
292 and very young infants living in endemic regions is the epidemiological evidence of the lowest risk  
293 of infection in this group. Maternal *S. flexneri* 2a LPS-IgG, SBA and OPKA titers were comparable  
294 or higher than those observed in North American volunteers who remained healthy following

295 challenge with wild-type *S. flexneri* 2a organisms (11). The functional antibody activity in the  
296 infants was noticeably below the threshold of clinical protected adults. In contrast, serum IgG  
297 against protective target antigens IpaB and VirG in mother and infant sera were well above those  
298 detected in the clinically protected challenged volunteers (11). The low levels of LPS-specific IgG  
299 and their limited functional capacity (SBA and OPKA) in cord blood, along with high levels of  
300 maternal protein-specific IgG and its efficient transfer, argue in favor of a more prominent role of  
301 antibodies against *Shigella* virulence antigens in preventing *Shigella* infection than originally  
302 appreciated. Similarly, others observed that naturally acquired maternal antibodies against  
303 pneumococcal proteins, unlike anti-polysaccharide antibodies, were associated with protection  
304 against nasal carriage in infants during the first 3 months of life (45). Further studies are warranted  
305 to dissect the mechanisms by which such antibodies block microbial infection (not captured by  
306 our traditional assays) and to corroborate their disease protective capacity in humans.

307 A *Shigella* vaccine that is efficacious in children under 3 years of age, the most vulnerable target  
308 group, would make a major public health impact. The limited efficacy of a clinically-advanced O-  
309 polysaccharide based vaccine candidate in young children (46, 47) has been linked with young  
310 children's hypo-responsiveness to *Shigella* LPS (and likely impaired bactericidal/phagocytic  
311 antibody activity). Our results showing the abundance of protein-specific antibodies in groups  
312 naturally immune (low-risk group) to *Shigella* and the ease with which children respond to protein-  
313 based immunization highlight the prospect of a *Shigella* protein-based vaccine approach. Purified  
314 IpaB and IpaD (48-50) or a formulation containing IpaB and IpaC (Invaplex, (51)) have been  
315 shown to prevent *Shigella* infection in preclinical studies. A vaccine combining multiple conserved  
316 *Shigella* proteins would not only be likely broadly protective, but also effective, targeting multiple  
317 mechanisms important for *Shigella* invasion and virulence.

318 One limitation in our study was that maternal serum was obtained within 3 months of birth. While  
319 some antibody features may change after birth, we did not find significant differences in maternal

320 titers determined in sera collected prior to or after delivery. The limited sample size may have also  
321 precluded more extensive and complex statistical analyses. It would be important to conduct  
322 similar analyses of the antibody repertoire beyond birth and through the first 3 years of life to  
323 better understand trends of disease and immune acquisition, and to investigate age-specific  
324 antibody mediated antimicrobial functions using age-relevant immune cells to recreate elements  
325 that would operate in vivo (17).

326 In summary, we have demonstrated, for the first time, the efficient placental transfer of maternal  
327 antibodies against *Shigella* protein antigens and their availability at high levels to the infant at birth  
328 along with the less efficient transfer of LPS-specific IgG with bactericidal and opsonophagocytic  
329 killing activity. Our results define the maternally-acquired protective antibody repertoire available  
330 to infants at birth and suggest a larger role for protein-specific immunity than has previously been  
331 appreciated. Revisiting the concept of a protein-based vaccine that would target these antigens  
332 either alone or in conjunction with *Shigella* LPS is warranted. Finally, these findings also  
333 emphasize the need to better understand strain-specific immunity in young children to inform  
334 preventive strategies.

335

### 336 **Acknowledgments**

337 We are grateful to the women who volunteered to participate and to the nurse midwives of the  
338 Mfera Health Centre maternity ward and antenatal clinic who supported this study. We thank Dr.  
339 Neeraj Kapoor and Dr. Jeff Fairman at Vaxcyte Inc. for providing IpaH for our ELISA studies. We  
340 thank Syze Gama and Dr. Avital Shimanovich for providing technical and logistic expertise during  
341 the sample collection process.

### 342 **Funding**

343 This project was supported in part by federal funds from the U.S. National Institutes of Health,  
344 under grant numbers R01AI117734 and R01AI125841 to M.F.P, a Research Supplement to

345 Promote Diversity in Health-Related Research Program, 3R01AI117734-04S1, and  
346 T32DK067872 to E.N.

347

348

## 349 **Methods**

### 350 **Study population and sample collection**

351 Our study population consisted of mothers and infants recruited between January and November  
352 2016 at Mfera Health Clinic, on the outskirts of Blantyre in Malawi. Healthy pregnant women who  
353 were HIV seronegative were enrolled either before birth (screening) or during delivery. Infants  
354 were enrolled at birth. Baseline information on mother and the infant's health was obtained during  
355 the first hours post-delivery. Other information such as village, baseline health info, and current  
356 physical complaints was also collected during the visit. Umbilical cord blood was collected at  
357 delivery at the Mfera Health Clinic. Venous maternal blood was obtained at enrollment, either  
358 during screening before birth, at a well-child visit (week 1, 6 or 10) or at 3 months. Samples were  
359 frozen and shipped to the University of Maryland School of Medicine in Baltimore for analysis.  
360 This study was approved by the Institutional Review Board of University of Maryland School of  
361 Medicine, and the College of Medicine Research and Ethics Committee (COMREC) at the College  
362 of Medicine in Malawi. All participating mothers provided written informed consent for themselves  
363 and their infants.

### 364 **Antigen-specific antibody analysis**

365 *Shigella* antigens IpaB, IpaC, IpaD, *S. flexneri* 2a LPS and *S. sonnei* LPS were obtained from  
366 Walter Reade Army Institute of Research (WRAIR). The N-terminal domain of VirG was  
367 expressed and purified inhouse in an *E. coli* expression system (Chitra STS et al, unpublished).  
368 The C-terminal domain of IpaH was expressed and purified using a cell-free expression system  
369 (Neeraj Kapoor, Vaxcyte, Inc. personal communication). Antigen-specific serum IgG titers were



370 measured by ELISA as previously described (52). Briefly, Immulon 2HB plates (Thermo Scientific,  
371 Waltham MA) were coated with IpaB, IpaC, IpaD and IpaH at 0.1µg/mL in PBS, and VirG, *S.*  
372 *flexneri* 2a LPS and *S. sonnei* LPS at 5µg/mL in carbonate buffer, pH 9.6. Plates were incubated  
373 for 3h at 37°C and blocked at 4°C overnight in PBS containing 10% w/v non-fat dry milk (NFDM).  
374 Sera diluted in PBS containing 10% NFDM and 0.05% Tween-20 (PBS-T) were added, and the  
375 plates incubated at 37°C for 1h. Plates were incubated with HRP-labeled goat IgG specific for  
376 human IgG (Jackson Immuno Research, West Grove, PA) for another 1h at 37°C. Plates were  
377 washed 6 times with PBS-T following every incubation step. Tetramethylbenzidine (TMB; KPL,  
378 Gaithersburg, MD) was added as substrate for 15 min in the dark with shaking, and the reaction  
379 was stopped by adding 1M phosphoric acid (Millipore Sigma, Burlington, MA). Endpoint titers  
380 were calculated as the inverse serum dilution that resulted in an absorbance value at 450 nm of  
381 0.2 above background and were reported as the ELISA units/mL.

382 Antigen-specific IgG subclasses were measured using *Shigella* multiplex assay using the  
383 MesoScale Diagnostic platform (MSD, Rockville, MD). Assays are run in the same way as the  
384 antigen-specific ELISAs, with a few exceptions: 1. There is no antigen-coating step as the  
385 antigens are pre-printed on MSD plates. 2. After the serum incubation step, the plates were  
386 incubated with biotinylated anti-IgG subclass antibodies (SouthernBiotech, Birmingham, AL) plus  
387 the SULFOtag-STREP (MSD) for another 1h at 37°C. 3. Binding was then detected using MSD  
388 GOLD Read buffer. The plates were read using an MSD sector imager, model 2400 and data  
389 analyzed by the MSD workbench software provided by the manufacturer. The ECL signal (minus  
390 background from blank) for each sample (diluted at 1:100 in PBS containing 10% NFDM) was  
391 reported.

### 392 **Functional assays**

393 SBA. The SBA assay was performed as previously described (53). SBA titers were determined  
394 by Opsotiter (53) as the reciprocal of the serum dilution that produced 50% bacterial killing as  
395 determined by Reed-Muench regression analysis. The provisional reference serum sample,



396 Korean QC19, was ran with each assay to normalize and reduce variability between assays.  
397 Korean QC19 was assigned a titer = 28000 for *S. flexneri* 2a and 1100 for *S sonnei* (53). The  
398 lowest dilution tested was 1:200 so that the lowest titer is 100.

399 OPKA. OPKA was also performed as previously described (11) with some modifications. Briefly,  
400 10  $\mu$ L of target bacteria ( $\sim 10^4$  CFU/mL) was opsonized by mixing with 20 $\mu$ L of a heat-inactivated,  
401 serially diluted test sample in a well of a round-bottom microtiter plate and incubated for 15min at  
402 37°C in room air, with shaking. As with the SBA, control wells had bacteria, baby rabbit  
403 complement (BRC), and buffer only; no test sample was added to these wells. 10 $\mu$ L of baby rabbit  
404 complement (10% final concentration), mixed with 60 $\mu$ L of 10<sup>5</sup> dimethylformamide (DMF)-  
405 differentiated HL-60 cells (ATCC CCL-240) were then added to the reaction mixture (for a 100 $\mu$ L  
406 total volume). Following a 45 min incubation at 37°C, 5% CO<sub>2</sub>, 10  $\mu$ L from each well was spotted  
407 on LB agar. The agar plates were incubated overnight at 29°C for *S. flexneri* 2a and 26°C for *S.*  
408 *sonnei*. The percentage of bacteria that were phagocytosed and killed per well was determined  
409 measuring the colony counts and determining the titer as was done for the SBA (above).  
410 Standardization of the *Shigella* OPKA has not yet been done, but the Korean QC19 was run with  
411 each assay and was found to have an average titer of 15574 for *S. flexneri* 2a and 288 for *S*  
412 *sonnei*. The lowest dilution tested was 1:200 so that the lowest titer is 100.

413 Antibody depletion. (i) LPS and IpaB-specific antibodies were sequestered by incubating serum  
414 samples into ELISA plates coated with serial dilutions of antigen (0 - 50 $\mu$ g/mL) as described above  
415 for 3 h at 37°C with shaking. The depleted serum sample was then tested for SBA activity as  
416 described above. (ii) IgM was removed by incubating serum samples with 50mM of beta-  
417 mercaptoethanol for 1 h at 37°C. The IgM-depleted serum was the further diluted and used in the  
418 SBA reaction as described above.

#### 419 **Statistical analysis**

420 Geometric mean titers (GMT) were calculated for antigen-specific IgG in maternal and cord blood  
421 sera. Comparisons of titers between maternal and cord samples, or between antibody levels

422 against different antigens, were measured by paired t-test or one-way analysis of variance  
423 (ANOVA) with Tukey's post-test correction. Placental transfer ratios were assessed as a ratio of  
424 cord blood divided by maternal antibody titers. Associations between maternal and cord blood  
425 titers were calculated using Pearson's correlation. A two-way ANOVA with Tukey's post-test  
426 correction was used to compare transfer ratios between IgG subclasses. All statistical analysis  
427 was conducted using GraphPad Prism 9.

## 428 References

- 429 1. GBD 2017 Causes of Death Collaborators. Global, regional, and national age-sex-specific  
430 mortality for 282 causes of death in 195 countries and territories, 1980–2017: a systematic  
431 analysis for the Global Burden of Disease Study 2017. *Lancet*. 2018;392:1736-88.
- 432 2. Khalil IA, Troeger C, Blacker BF, Rao PC, Brown A, Atherly DE, et al. Morbidity and mortality  
433 due to *Shigella* and enterotoxigenic *Escherichia coli* diarrhoea: the Global Burden of Disease  
434 Study 1990-2016. *Lancet Infect Dis*. 2018;18(11):1229-40.
- 435 3. Khalil I, Troeger CE, Blacker BF, Reiner RC, Jr. Capturing the true burden of Shigella and  
436 ETEC: The way forward. *Vaccine*. 2019;37(34):4784-6.
- 437 4. Guerrant RL, DeBoer MD, Moore SR, Scharf RJ, Lima AA. The impoverished gut--a triple  
438 burden of diarrhoea, stunting and chronic disease. *Nat Rev Gastroenterol Hepatol*.  
439 2013;10(4):220-9.
- 440 5. WHO. WHO publishes list of bacteria for which new antibiotics are urgently needed 2017  
441 [Available from: [https://www.who.int/news/item/27-02-2017-who-publishes-list-of-bacteria-](https://www.who.int/news/item/27-02-2017-who-publishes-list-of-bacteria-for-which-new-antibiotics-are-urgently-needed)  
442 [for-which-new-antibiotics-are-urgently-needed](https://www.who.int/news/item/27-02-2017-who-publishes-list-of-bacteria-for-which-new-antibiotics-are-urgently-needed)].
- 443 6. Oaks EV, Hale TL, Formal SB. Serum immune response to *Shigella* protein antigens in rhesus  
444 monkeys and humans infected with *Shigella spp*. *Infect Immun*. 1986;53(1):57-63.
- 445 7. Cohen D, Green MS, Block C, Rouach T, Ofek I. Serum antibodies to lipopolysaccharide and  
446 natural immunity to shigellosis in an Israeli military population. *J Infect Dis*. 1988;157(5):1068-  
447 71.
- 448 8. Robin G, Cohen D, Orr N, Markus I, Slepion R, Ashkenazi S, et al. Characterization and  
449 quantitative analysis of serum IgG class and subclass response to Shigella sonnei and  
450 Shigella flexneri 2a lipopolysaccharide following natural Shigella infection. *J Infect Dis*.  
451 1997;175(5):1128-33.
- 452 9. Oberhelman RA, Kopecko DJ, Salazar-Lindo E, Gotuzzo E, Buysse JM, Venkatesan MM, et  
453 al. Prospective study of systemic and mucosal immune responses in dysenteric patients to  
454 specific *Shigella* invasion plasmid antigens and lipopolysaccharides. *Infect Immun*.  
455 1991;59(7):2341-50.
- 456 10. Cohen D, Meron-Sudai S, Bialik A, Asato V, Goren S, Ariel-Cohen O, et al. Serum IgG  
457 antibodies to Shigella lipopolysaccharide antigens - a correlate of protection against  
458 shigellosis. *Hum Vaccin Immunother*. 2019;15(6):1401-8.
- 459 11. Shimanovich AA, Buskirk AD, Heine SJ, Blackwelder WC, Wahid R, Kotloff KL, et al.  
460 Functional and Antigen-Specific Serum Antibody Levels as Correlates of Protection against  
461 Shigellosis in a Controlled Human Challenge Study. *Clin Vaccine Immunol*. 2017;24(2).
- 462 12. Van de Verg LL, Herrington DA, Boslego J, Lindberg AA, Levine MM. Age-specific prevalence  
463 of serum antibodies to the invasion plasmid and lipopolysaccharide antigens of *Shigella*  
464 species in Chilean and North American populations. *J Infect Dis*. 1992;166(1):158-61.
- 465 13. Raqib R, Qadri F, SarkEr P, Mia SM, Sansonetti PJ, Albert MJ, et al. Delayed and reduced  
466 adaptive humoral immune responses in children with shigellosis compared with in adults.  
467 *Scand J Immunol*. 2002;55(4):414-23.
- 468 14. Kotloff KL, Nataro JP, Blackwelder WC, Nasrin D, Farag TH, Panchalingam S, et al. Burden  
469 and aetiology of diarrhoeal disease in infants and young children in developing countries (the  
470 Global Enteric Multicenter Study, GEMS): a prospective, case-control study. *Lancet*.  
471 2013;382(9888):209-22.
- 472 15. Ferreccio C, Prado V, Ojeda A, Cayyazo M, Abrego P, Guers L, et al. Epidemiologic patterns  
473 of acute diarrhea and endemic Shigella infections in children in a poor periurban setting in  
474 Santiago, Chile. *Am J Epidemiol*. 1991;134(6):614-27.
- 475 16. Ogra PL. Immunology of Human Milk and Lactation: Historical Overview. *Nestle Nutr Inst*  
476 *Workshop Ser*. 2020;94:11-26.

- 477 17. Jennewein MF, Goldfarb I, Dolatshahi S, Cosgrove C, Noelette FJ, Krykbaeva M, et al. Fc  
478 Glycan-Mediated Regulation of Placental Antibody Transfer. *Cell*. 2019;178(1):202-15 e14.
- 479 18. Fu C, Lu L, Wu H, Shaman J, Cao Y, Fang F, et al. Placental antibody transfer efficiency and  
480 maternal levels: specific for measles, coxsackievirus A16, enterovirus 71, poliomyelitis I-III  
481 and HIV-1 antibodies. *Sci Rep*. 2016;6:38874.
- 482 19. Clements T, Rice TF, Vamvakas G, Barnett S, Barnes M, Donaldson B, et al. Update on  
483 Transplacental Transfer of IgG Subclasses: Impact of Maternal and Fetal Factors. *Front*  
484 *Immunol*. 2020;11:1920.
- 485 20. Livio S, Strockbine NA, Panchalingam S, Tennant SM, Barry EM, Marohn ME, et al. *Shigella*  
486 *Isolates From the Global Enteric Multicenter Study Inform Vaccine Development*.  
487 *ClinInfectDis*. 2014.
- 488 21. Lin J, Smith MA, Benjamin WH, Jr., Kaminski RW, Wenzel H, Nahm MH. Monoclonal  
489 Antibodies to *Shigella* Lipopolysaccharide Are Useful for Vaccine Production. *Clin Vaccine*  
490 *Immunol*. 2016;23(8):681-8.
- 491 22. Cohen D, Green MS, Block C, Slepon R, Ofek I. Prospective study of the association between  
492 serum antibodies to lipopolysaccharide O antigen and the attack rate of shigellosis.  
493 *JClinMicrobiol*. 1991;29(2):386-9.
- 494 23. Simister NE. Placental transport of immunoglobulin G. *Vaccine*. 2003;21(24):3365-9.
- 495 24. Vidarsson G, Dekkers G, Rispens T. IgG subclasses and allotypes: from structure to effector  
496 functions. *Front Immunol*. 2014;5:520.
- 497 25. Wilcox CR, Holder B, Jones CE. Factors Affecting the FcRn-Mediated Transplacental  
498 Transfer of Antibodies and Implications for Vaccination in Pregnancy. *Front Immunol*.  
499 2017;8:1294.
- 500 26. Riddle MS, Kaminski RW, Di Paolo C, Porter CK, Gutierrez RL, Clarkson KA, et al. Safety and  
501 Immunogenicity of a Candidate Bioconjugate Vaccine against *Shigella flexneri* 2a  
502 Administered to Healthy Adults: a Single-Blind, Randomized Phase I Study. *Clin Vaccine*  
503 *Immunol*. 2016;23(12):908-17.
- 504 27. Cohen D, Atsmon J, Artaud C, Meron-Sudai S, Gougeon ML, Bialik A, et al. Safety and  
505 immunogenicity of a synthetic carbohydrate conjugate vaccine against *Shigella flexneri* 2a in  
506 healthy adult volunteers: a phase 1, dose-escalating, single-blind, randomised, placebo-  
507 controlled study. *Lancet Infect Dis*. 2020.
- 508 28. Clarkson KA, Talaat KR, Alaimo C, Martin P, Bourgeois AL, Dreyer A, et al. Immune response  
509 characterization in a human challenge study with a *Shigella flexneri* 2a bioconjugate vaccine.  
510 *EBioMedicine*. 2021;66:103308.
- 511 29. Passwell JH, Freier S, Shor R, Farzam N, Block C, Lison M, et al. *Shigella* lipopolysaccharide  
512 antibodies in pediatric populations. *PediatrInfectDisJ*. 1995;14(10):859-65.
- 513 30. Thompson CN, Le TP, Anders KL, Nguyen TH, Lu LV, Nguyen VV, et al. The transfer and  
514 decay of maternal antibody against *Shigella sonnei* in a longitudinal cohort of Vietnamese  
515 infants. *Vaccine*. 2016;34(6):783-90.
- 516 31. Islam D, Wretling B, Ryd M, Lindberg AA, Christensson B. Immunoglobulin subclass  
517 distribution and dynamics of *Shigella*-specific antibody responses in serum and stool samples  
518 in shigellosis. *Infect Immun*. 1995;63(5):2054-61.
- 519 32. Sayem MA, Ahmad SM, Rekha RS, Sarker P, Agerberth B, Talukder KA, et al. Differential  
520 host immune responses to epidemic and endemic strains of *Shigella dysenteriae* type I. *J*  
521 *Health Popul Nutr*. 2011;29(5):429-37.
- 522 33. Palmeira P, Quinello C, Silveira-Lessa AL, Zago CA, Carneiro-Sampaio M. IgG Placental  
523 Transfer in Healthy and Pathological Pregnancies. *Clinical and Developmental Immunology*.  
524 2012;2012:985646.

- 525 34. Stach SC, Brizot ML, Liao AW, Palmeira P, Francisco RP, Carneiro-Sampaio MM, et al.  
526 Placental transfer of IgG antibodies specific to Klebsiella and Pseudomonas LPS and to group  
527 B Streptococcus in twin pregnancies. *Scand J Immunol.* 2015;81(2):135-41.
- 528 35. van den Berg JP, Westerbeek EA, Berbers GA, van Gageldonk PG, van der Klis FR, van  
529 Elburg RM. Transplacental transport of IgG antibodies specific for pertussis, diphtheria,  
530 tetanus, haemophilus influenzae type b, and Neisseria meningitidis serogroup C is lower in  
531 preterm compared with term infants. *Pediatr Infect Dis J.* 2010;29(9):801-5.
- 532 36. Einhorn MS, Granoff DM, Nahm MH, Quinn A, Shackelford PG. Concentrations of antibodies  
533 in paired maternal and infant sera: relationship to IgG subclass. *J Pediatr.* 1987;111(5):783-  
534 8.
- 535 37. Amir J, Scott MG, Nahm MH, Granoff DM. Bactericidal and opsonic activity of IgG1 and IgG2  
536 anticapsular antibodies to Haemophilus influenzae type b. *J Infect Dis.* 1990;162(1):163-71.
- 537 38. Aase A, Michaelsen TE. Opsonophagocytic activity induced by chimeric antibodies of the four  
538 human IgG subclasses with or without help from complement. *Scand J Immunol.*  
539 1994;39(6):581-7.
- 540 39. Lortan JE, Kaniuk AS, Monteil MA. Relationship of in vitro phagocytosis of serotype 14  
541 Streptococcus pneumoniae to specific class and IgG subclass antibody levels in healthy  
542 adults. *Clin Exp Immunol.* 1993;91(1):54-7.
- 543 40. Gitlin D, Rosen FS, Michael JG. Transient 19S gammaglobulin deficiency in the newborn  
544 infant, and its significance. *Pediatrics.* 1963;31:197-208.
- 545 41. de Alwis R, Tu LTP, Quynh NLT, Thompson CN, Anders KL, Van Thuy NT, et al. The Role of  
546 Maternally Acquired Antibody in Providing Protective Immunity Against Nontyphoidal  
547 Salmonella in Urban Vietnamese Infants: A Birth Cohort Study. *J Infect Dis.* 2019;219(2):295-  
548 304.
- 549 42. Deorari AK, Broor S, Maitreyi RS, Agarwal D, Kumar H, Paul VK, et al. Incidence, clinical  
550 spectrum, and outcome of intrauterine infections in neonates. *J Trop Pediatr.* 2000;46(3):155-  
551 9.
- 552 43. King CL, Malhotra I, Wamachi A, Kioko J, Mungai P, Wahab SA, et al. Acquired immune  
553 responses to Plasmodium falciparum merozoite surface protein-1 in the human fetus. *J*  
554 *Immunol.* 2002;168(1):356-64.
- 555 44. Xia L, Gildersleeve JC. Anti-glycan IgM repertoires in newborn human cord blood. *PLoS One.*  
556 2019;14(7):e0218575.
- 557 45. Ojal J, Goldblatt D, Tigoï C, Scott JAG. Effect of Maternally Derived Anti-protein and  
558 Anticapsular IgG Antibodies on the Rate of Acquisition of Nasopharyngeal Carriage of  
559 Pneumococcus in Newborns. *Clin Infect Dis.* 2018;66(1):121-30.
- 560 46. Passwell JH, Ashkenazi S, Harlev E, Miron D, Ramon R, Farzam N, et al. Safety and  
561 immunogenicity of Shigella sonnei-CRM9 and Shigella flexneri type 2a-rEPAsucc conjugate  
562 vaccines in one- to four-year-old children. *Pediatr Infect Dis J.* 2003;22(8):701-6.
- 563 47. Passwell JH, Ashkenazi S, Banet-Levi Y, Ramon-Saraf R, Farzam N, Lerner-Geva L, et al.  
564 Age-related efficacy of Shigella O-specific polysaccharide conjugates in 1-4-year-old Israeli  
565 children. *Vaccine.* 2010;28(10):2231-5.
- 566 48. Heine SJ, Diaz-McNair J, Martinez-Becerra FJ, Choudhari SP, Clements JD, Picking WL, et  
567 al. Evaluation of immunogenicity and protective efficacy of orally delivered Shigella type III  
568 secretion system proteins IpaB and IpaD. *Vaccine.* 2013;31(28):2919-29.
- 569 49. Heine SJ, Diaz-McNair J, Andar AU, Drachenberg CB, Van D, V, Walker R, et al. Intradermal  
570 delivery of Shigella IpaB and IpaD type III secretion proteins: kinetics of cell recruitment and  
571 antigen uptake, mucosal and systemic immunity, and protection across serotypes. *J Immunol.*  
572 2014;192(4):1630-40.

- 573 50. Heine SJ, Franco-Mahecha OL, Chen X, Choudhari S, Blackwelder WC, van Roosmalen ML,  
 574 et al. *Shigella* IpaB and IpaD displayed on *L. lactis* bacterium-like particles induce protective  
 575 immunity in adult and infant mice. *ImmunolCell Biol.* 2015;93(7):641-52.  
 576 51. Turbyfill KR, Clarkson KA, Vortherms AR, Oaks EV, Kaminski RW. Assembly, Biochemical  
 577 Characterization, Immunogenicity, Adjuvanticity, and Efficacy of *Shigella* Artificial Invaplex.  
 578 *mSphere.* 2018;3(2).  
 579 52. Kotloff KL, Pasetti MF, Barry EM, Nataro JP, Wasserman SS, Sztein MB, et al. Deletion in the  
 580 *Shigella* enterotoxin genes further attenuates *Shigella flexneri* 2a bearing guanine auxotrophy  
 581 in a phase 1 trial of CVD 1204 and CVD 1208. *JInfectDis.* 2004;190(10):1745-54.  
 582 53. Nahm MH, Yu J, Weerts HP, Wenzel H, Tamilselvi CS, Chandrasekaran L, et al.  
 583 Development, Interlaboratory Evaluations, and Application of a Simple, High-Throughput  
 584 *Shigella* Serum Bactericidal Assay. *mSphere.* 2018;3(3).  
 585

## 586 Tables

**Table 1. Baseline Characteristics of 63 Participating Mother-Infant Pairs**

| Characteristic                                    | Value         |
|---------------------------------------------------|---------------|
| Maternal characteristics                          |               |
| Age, y, median (range)                            | 26 (17-43)    |
| Parity, median (range)                            | 3 (0-8)       |
| Infant characteristics                            |               |
| Female sex (%)                                    | 36 (57%)      |
| Birth weight, kg, median (range)                  | 3.1 (1.5-4.3) |
| < 2.5 kg (low birth weight), n (%)                | 5 (8%)        |
| Twin births, n (%)                                | 3(4.8%)       |
| Born during rainy season (November- April), n (%) | 21 (33%)      |

587

**Table 2. *Shigella* antigen-specific titers**

| Antigen                   | Cord blood titer (EU/mL)<br>GMT (range) | Maternal serum titer (EU/mL)<br>GMT (range) | Transfer ratio<br>Mean (range) |
|---------------------------|-----------------------------------------|---------------------------------------------|--------------------------------|
| <i>S. flexneri</i> 2a LPS | 1,752 (120-26,789)                      | 3,491 (153-123,844)                         | 0.60 (0.05-2.20)               |
| <i>S. sonnei</i> LPS      | 1,264 (45-19,002)                       | 2,109 (135-32,727)                          | 0.70 (0.23-3.38)               |
| IpaB                      | 77,134 (7,274-419,898)                  | 73,737 (6,818-324,773)                      | 1.10 (0.27-2.00)               |
| IpaC                      | 21,856 (279-125,268)                    | 21,732 (292-127,040)                        | 1.06 (0.34-2.02)               |
| IpaD                      | 9,761 (84-92,804)                       | 10,653 (81-112,576)                         | 0.98 (0.26-2.08)               |
| IpaH                      | 19,890 (1,224-122,206)                  | 21,156 (1,067-145,110)                      | 1.00 (0.21-1.98)               |
| VirG                      | 14,840 (3,038-63,877)                   | 15,726 (2,003-75,273)                       | 1.01 (0.29-3.71)               |



588

**Table 3. *Shigella* functional antibody (SBA and OPKA) titers**

| <b>Antigen</b>             | <b>Cord blood GMT (range)</b> | <b>Maternal serum GMT (range)</b> | <b>Transfer ratio Mean (range)</b> |
|----------------------------|-------------------------------|-----------------------------------|------------------------------------|
| <i>S. flexneri</i> 2a SBA  | 1,227 (200-113,628)           | 44,076 (6,889-1,278,483)          | 0.16 (0.00-2.78)                   |
| <i>S. flexneri</i> 2a OPKA | 895 (100-178,424)             | 26,944 (2,770-596,279)            | 0.18 (0.00-1.77)                   |
| <i>S. sonnei</i> SBA       | 832 (200-13,536)              | 1,017 (200-17,916)                | 1.29 (0.19-13.61)                  |
| <i>S. sonnei</i> OPKA      | 245 (100-2,468)               | 357 (100-2,460)                   | 0.78 (0.18-3.03)                   |

589

## 590 **Figure Legends**

591 **Figure 1. Flowchart showing selection of paired maternal-infant samples**

592 **Figure 2. *Shigella*-specific maternal antibody repertoire and placental transfer efficiency.**

593 (A) IgG against *Shigella* LPS and protein antigens in maternal (M) and cord blood (CB) sera.

594 Symbols represent individual titers. Asterisks indicate statistically significant differences between

595 M and CB titers as determined by paired t test. \*  $P < 0.05$ , \*\*\*\*  $P < 0.0001$ . (B) Placental transfer

596 ratios (CB titer/M titer) for antibodies against each antigen. Whiskers show minimum and

597 maximum values. Line is at ratio = 1. (C) Associations between maternal and cord blood titers for

598 each antigen. Pearson's  $r$  and  $P$  values are shown within each graph. (D) Heatmaps showing

599 association between the antibody titers against each antigen in maternal serum (left) and in cord

600 blood serum (right). Pearson correlation,  $r$ , is shown in each box.

601 **Figure 3. IgG subclass distribution of maternal and infant placentally acquired antibodies.**

602 (A) ECL signal for IgG1, IgG2, IgG3 and IgG4 against *Shigella* antigens measured in serum from

603 mothers (M) and cord blood (CB) diluted at 1:100. Symbols represent individual titers. (B) Mean

604 placental transfer ratios (CB titer/M titer) for subclass. Dashed line is at ratio = 1. (C) Heatmap

605 representing transfer ratios of total IgG and IgG subclasses against *Shigella* antigens. Asterisks

606 indicate statistically significant differences as determined by Paired t test. \*,  $P < 0.05$ , \*\*,  $P < 0.01$ ,

607 \*\*\*,  $P < 0.001$ , \*\*\*\*,  $P < 0.0001$ . For the bar graphs, significance was evaluated using a two-way  
608 ANOVA with a Tukey's post-test correction.

609 **Figure 4. Maternal and infant placentally acquired functional antibodies against *Shigella*.**

610 (A) Serum bactericidal antibody (SBA) and (B) opsonophagocytic killing antibody (OPKA) titers  
611 measured in serum from mothers (M) and cord blood (CB) (left graphs). Data represent individual  
612 titers. Placental transfer ratios (CB titer/M titer) are shown on the graphs on the right. Data  
613 represent individual titers. Asterisks indicate statistically significant differences between M and  
614 CB titers as determined by one-way ANOVA with a Tukey's post-test correction (\*\*  $P < 0.01$ , \*\*\*  
615  $P < 0.001$ , \*\*\*\*  $P < 0.0001$ ). Whiskers indicate minimum and maximum values. Line is at ratio = 1.  
616 (C) and (D) Associations between maternal and cord blood SBA and OPKA titers, respectively.  
617 Pearson's  $r$  and  $P$  values are shown within each graph.

618 **Figure 5. *Shigella* LPS-specific antibodies exhibit bactericidal activity.** (A) Depletion of IpaB-

619 or LPS-specific antibodies (left panel) and percent killing of *S. flexneri* 2a in a bactericidal assay  
620 using antibody-depleted sera (right panel). Darker-shaded symbols represent maternal sera and  
621 lighter-shaded symbols represent infant sera. (B) Correlations between maternal LPS IgG and  
622 SBA for *S. flexneri* 2a (left panel) or *S. sonnei* (right panel). (C) Mean IgM titers (bars) against *S.*  
623 *flexneri* 2a and *S. sonnei* LPS in maternal (M) and cord blood (CB) sera. Symbols represent  
624 individual titers. Maternal and cord blood titers were compared by one-way ANOVA with a Tukey's  
625 post-test correction (\*\*\*\*,  $P < 0.0001$ ). (D) Mean SBA titers (bars) in maternal serum before (Total)  
626 or after IgM depletion (IgM depleted). SBA titers in the two groups were compared by paired t test  
627 (\*\*,  $P < 0.01$ ). Symbols represent individual titers. (E) Associations between *S. flexneri* 2a LPS  
628 IgG and SBA titers before (filled circle) and after IgM depletion (open circles). Pearson's  $r$  values  
629 are shown within the graph. (F) Heatmap showing associations (Pearson's  $r$ ) between SBA and  
630 Total IgG, IgG subclasses and IgM against LPS.



631 **Figure 6. Comparative analysis of *Shigella* antigen-specific and functional antibody titers**  
632 **in the mother-infant dyad in relation to clinical protection.** *Shigella* antigen-specific (A) and  
633 *S. flexneri* 2a functional (B) antibody titers measured side-by-side in pre-challenge serum from  
634 North American individuals (black squares, protected) that were either healthy or had mild disease  
635 after wild-type *Shigella* challenge and in maternal (M) or cord blood (CB) sera from the Malawi  
636 cohort. Data represent individual titers. Differences between groups was determined by paired t-  
637 test (ns  $P > 0.05$ , \*  $P < 0.05$ , \*\*  $P < 0.01$ , \*\*\*  $P < 0.001$ , \*\*\*\*  $P < 0.0001$ ).

638

639

**Figure 1**

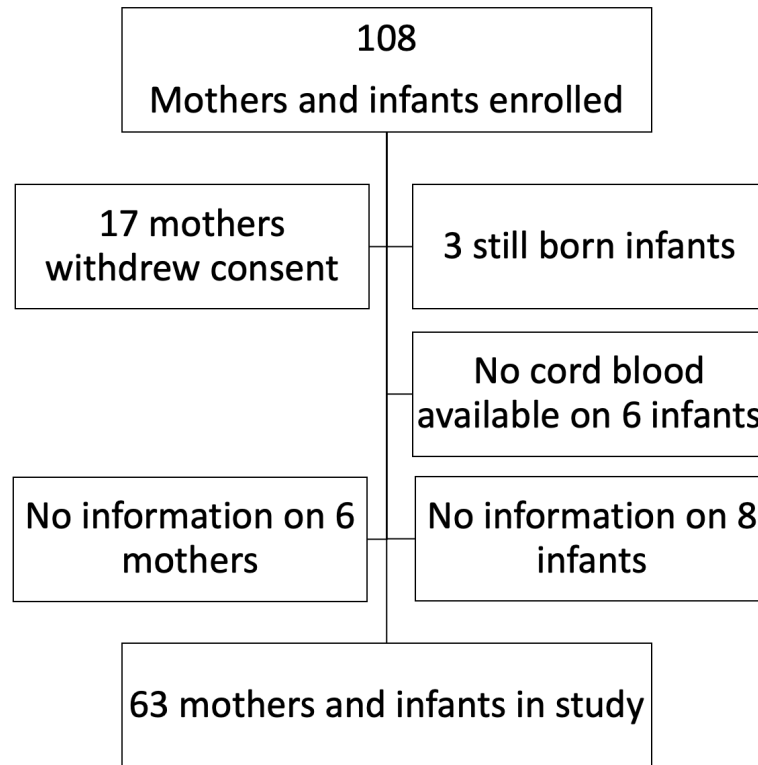

**Figure 1. Flowchart showing selection of paired maternal-infant samples**

**Figure 2**

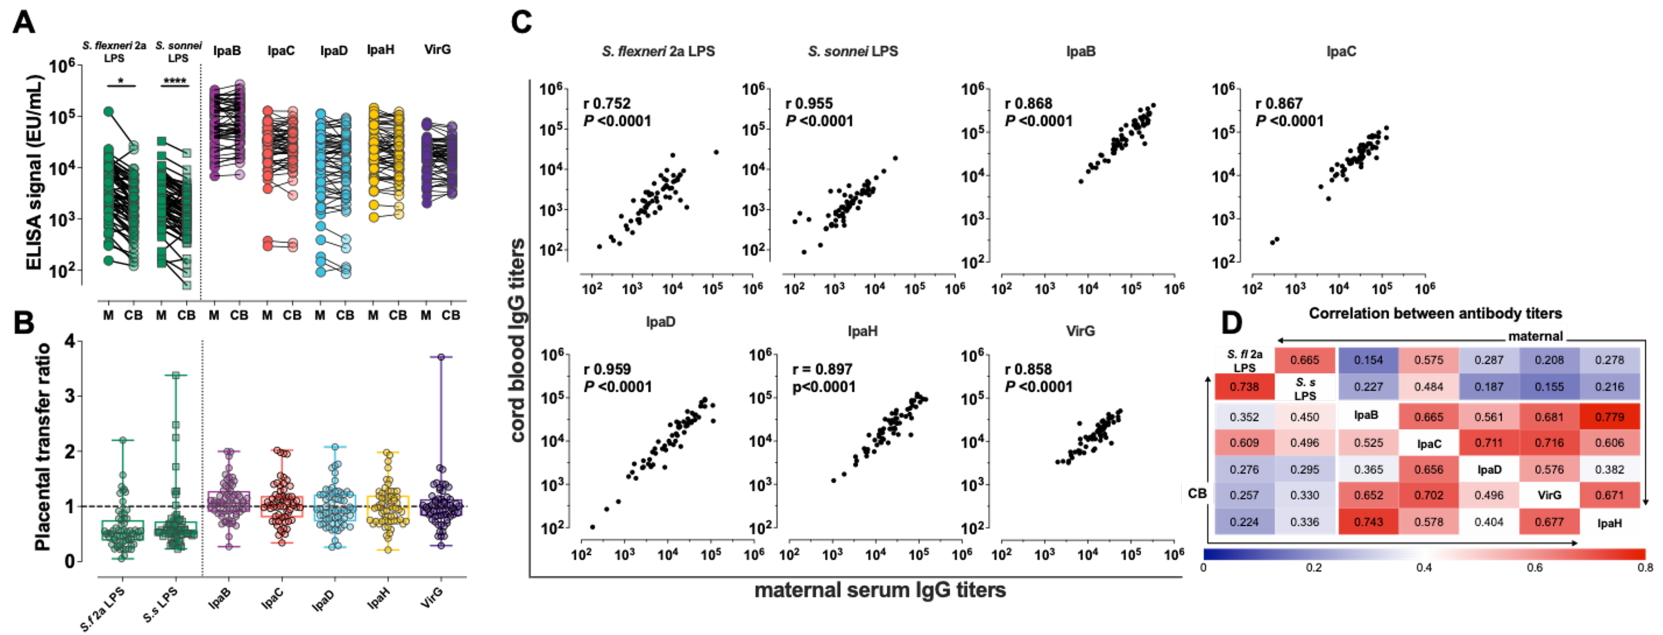

**Figure 2. *Shigella*-specific maternal antibody repertoire and placental transfer efficiency.** (A) IgG against *Shigella* LPS and protein antigens in maternal (M) and cord blood (CB) sera. Symbols represent individual titers. Asterisks indicate statistically significant differences between M and CB titers as determined by paired t test. \*  $P < 0.05$ , \*\*\*\*  $P < 0.0001$ . (B) Placental transfer ratios (CB titer/M titer) for antibodies against each antigen. Whiskers show minimum and maximum values. Line is at ratio = 1. (C) Associations between maternal and cord blood titers for each antigen. Pearson's  $r$  and  $P$  values are shown within each graph. (D) Heatmaps showing association between the antibody titers against each antigen in maternal serum (left) and in cord blood serum (right). Pearson correlation,  $r$ , is shown in each box.

**Figure 3**

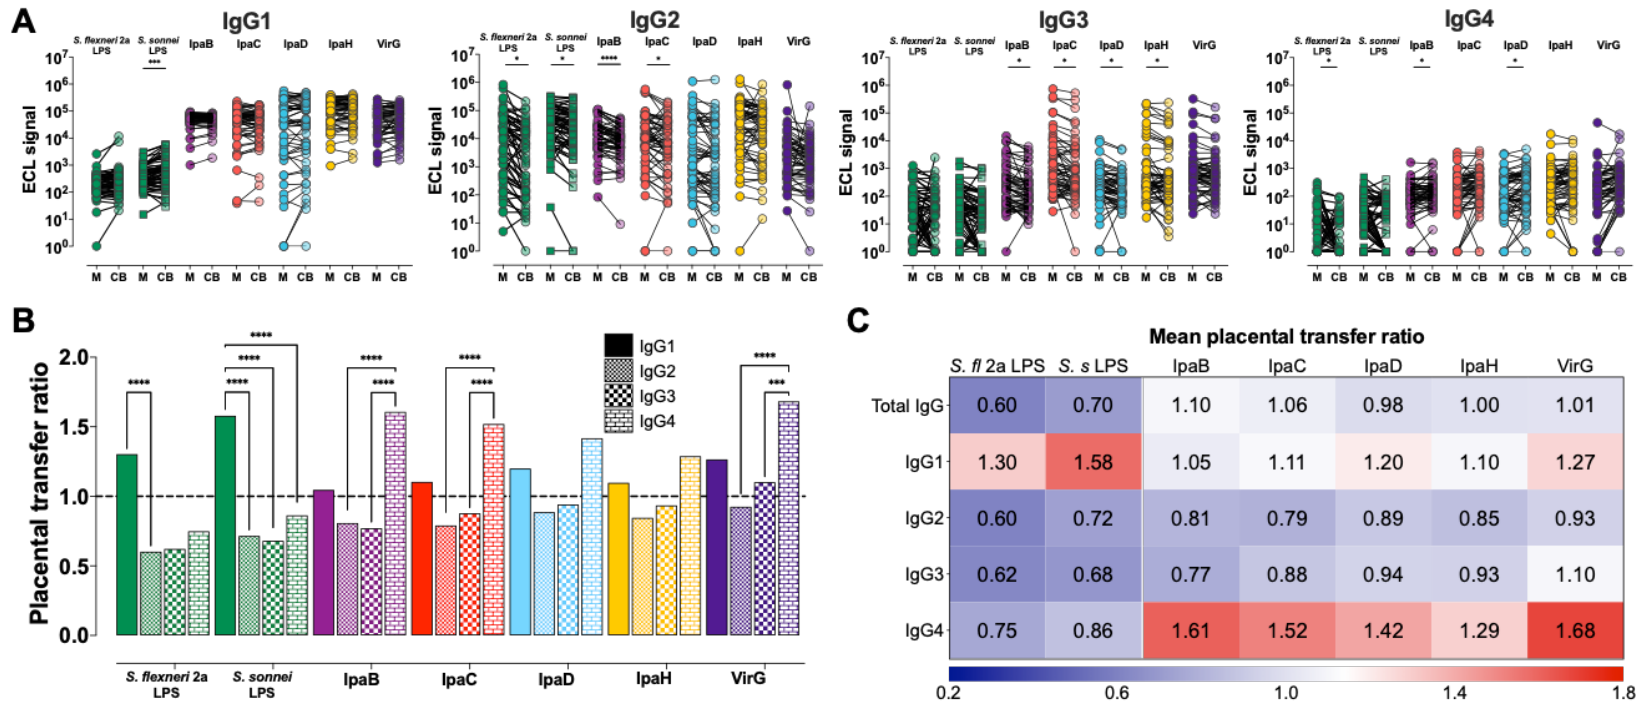

**Figure 3. IgG subclass distribution of maternal and infant placentally acquired antibodies.** (A) ECL signal for IgG1, IgG2, IgG3 and IgG4 against *Shigella* antigens measured in serum from mothers (M) and cord blood (CB) diluted at 1:100. Symbols represent individual titers. (B) Mean placental transfer ratios (CB titer/M titer) for subclass. Dashed line is at ratio = 1. (C) Heatmap representing transfer ratios of total IgG and IgG subclasses against *Shigella* antigens. Asterisks indicate statistically significant differences as determined by Paired t test. \*,  $P < 0.05$ , \*\*,  $P < 0.01$ , \*\*\*,  $P < 0.001$ , \*\*\*\*,  $P < 0.0001$ . For the bar graphs, significance was evaluated using a two-way ANOVA with a Tukey's post-test correction.

**Figure 4**

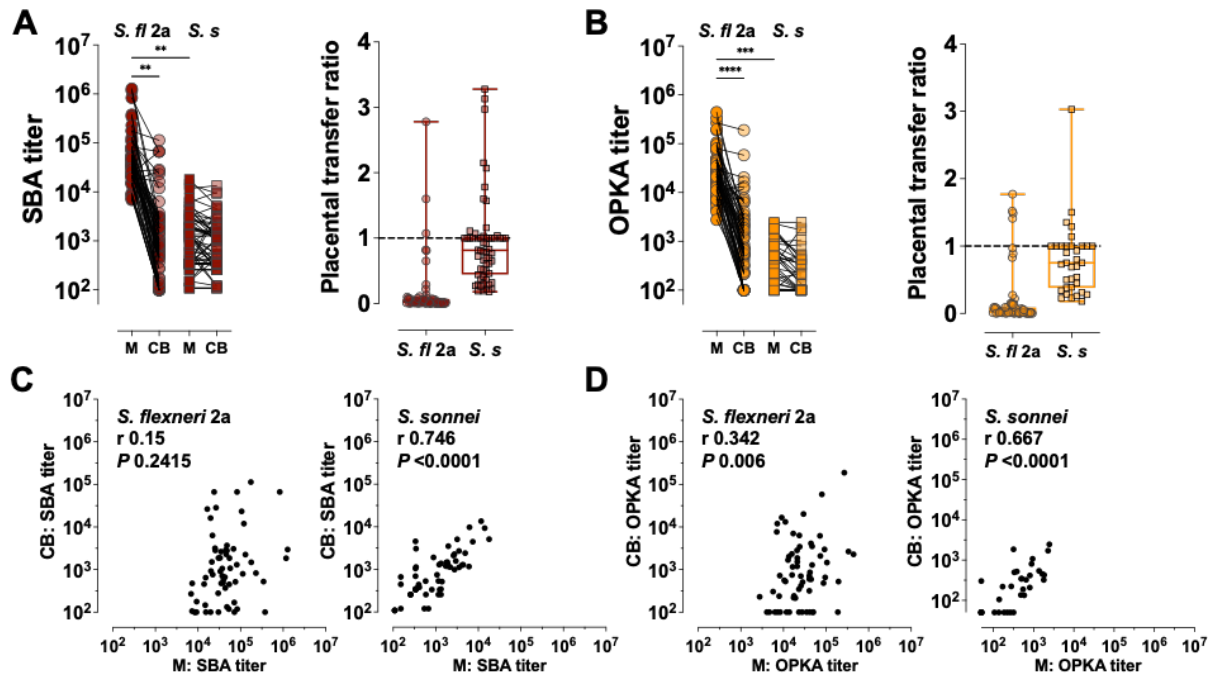

**Figure 4. Maternal and infant placentally acquired functional antibodies against *Shigella*.** (A) Serum bactericidal antibody (SBA) and (B) opsonophagocytic killing antibody (OPKA) titers measured in serum from mothers (M) and cord blood (CB) (left graphs). Data represent individual titers. Placental transfer ratios (CB titer/M titer) are shown on the graphs on the right. Data represent individual titers. Asterisks indicate statistically significant differences between M and CB titers as determined by one-way ANOVA with a Tukey's post-test correction (\*\*  $P < 0.01$ , \*\*\*  $P < 0.001$ , \*\*\*\*  $P < 0.0001$ ). Whiskers indicate minimum and maximum values. Line is at ratio = 1. (C) and (D) Associations between maternal and cord blood SBA and OPKA titers, respectively. Pearson's  $r$  and  $P$  values are shown within each graph.

**Figure 5**

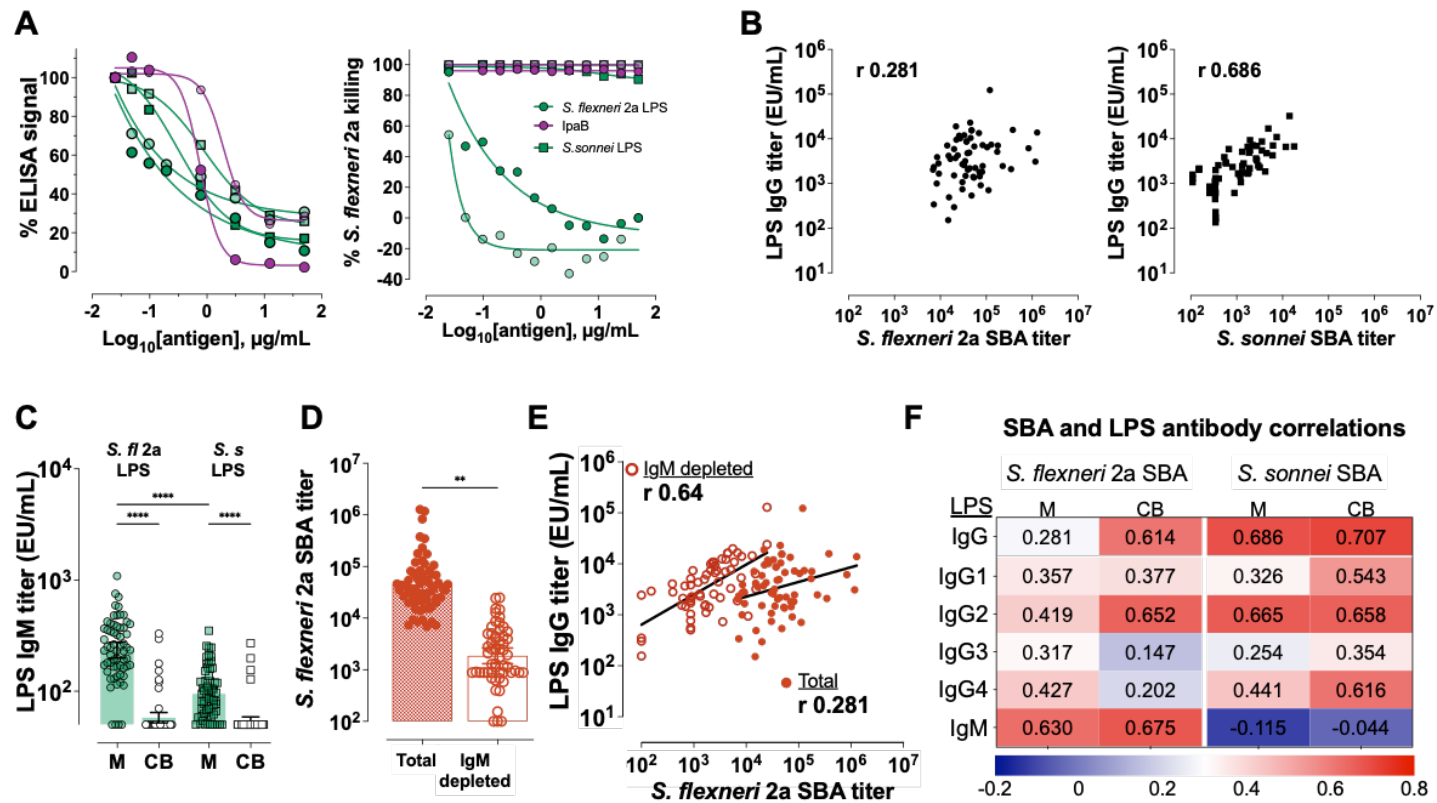

**Figure 5. *Shigella* LPS-specific antibodies exhibit bactericidal activity.** (A) Depletion of IpaB- or LPS-specific antibodies (left panel) and percent killing of *S. flexneri* 2a in a bactericidal assay using antibody-depleted sera (right panel). Darker-shaded symbols represent maternal sera and lighter-shaded symbols represent infant sera. (B) Correlations between maternal LPS IgG and SBA for *S. flexneri* 2a (left panel) or *S. sonnei* (right panel). (C) Mean IgM titers (bars) against *S. flexneri* 2a and *S. sonnei* LPS in maternal (M) and cord blood (CB) sera. Symbols represent individual titers. Maternal and cord blood titers were compared by one-way ANOVA with a Tukey's post-test correction (\*\*\*\*,  $P < 0.0001$ ). (D) Mean SBA titers (bars) in maternal serum before (Total) or after IgM depletion (IgM depleted). SBA titers in the two groups were compared by paired t test (\*\*,  $P < 0.01$ ). Symbols represent individual titers. (E) Associations between *S. flexneri* 2a LPS IgG and SBA titers before (filled circle) and after IgM depletion (open circles). Pearson's  $r$  values are shown within the graph. (F) Heatmap showing associations (Pearson's  $r$ ) between SBA and Total IgG, IgG subclasses and IgM against LPS.

Figure 6

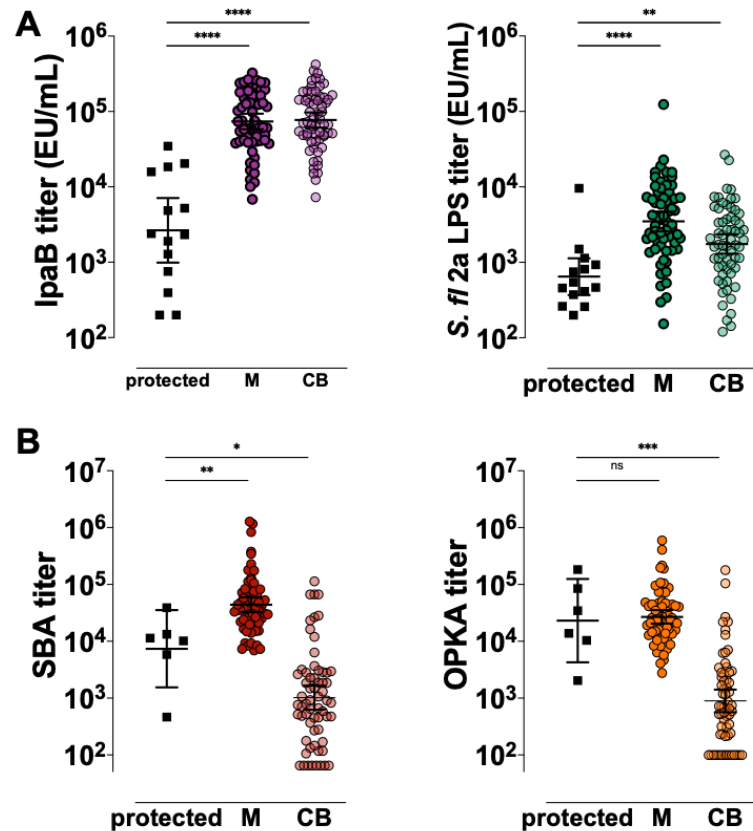

Figure 6. Comparative analysis of *Shigella* antigen-specific and functional antibody titers in the mother-infant dyad in relation to clinical protection. *Shigella* antigen-specific (A) and *S. flexneri* 2a functional (B) antibody titers measured side-by-side in pre-challenge serum from North American individuals (black squares, protected) that were either healthy or had mild disease after wild-type *Shigella* challenge and in maternal (M) or cord blood (CB) sera from the Malawi cohort. Data represent individual titers. Differences between groups was determined by paired t-test (ns  $P > 0.05$ , \*  $P < 0.05$ , \*\*  $P < 0.01$ , \*\*\*  $P < 0.001$ , \*\*\*\*  $P < 0.0001$ ).
